# Supplementary material for: Long-term trends in agricultural droughts over Netherlands and Germany: how extreme was the year 2018?
Source: Copernicus journal article supplement (doi:10.5194/hess-2021-569), 2021-11-24
Supplement: Supplementary file 1 [file hess-2021-569-supplement.pdf]

## Supplementary material

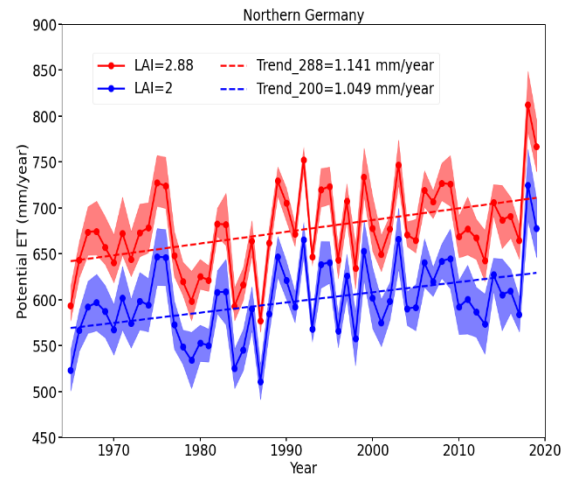

(a)

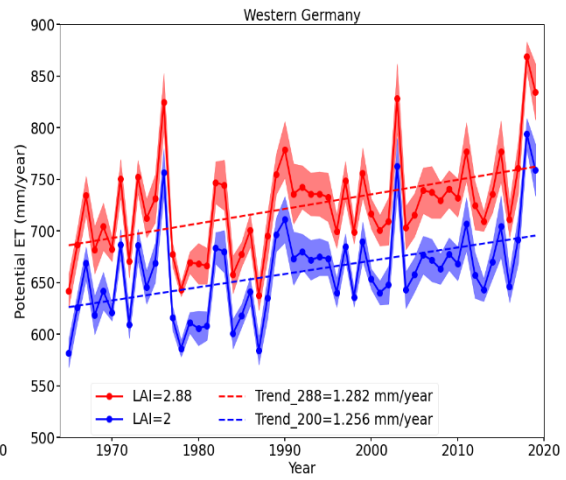

(b)

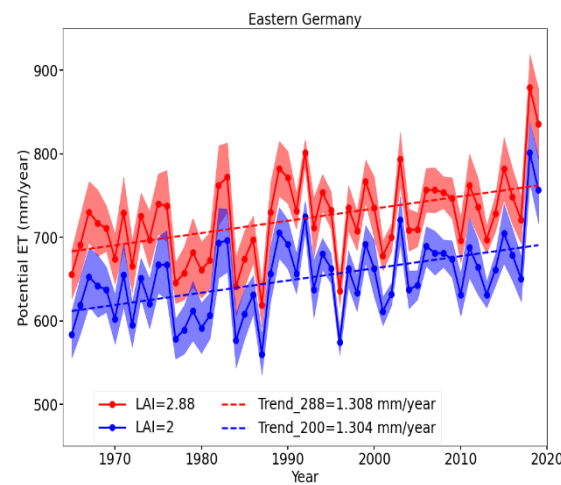

(c)

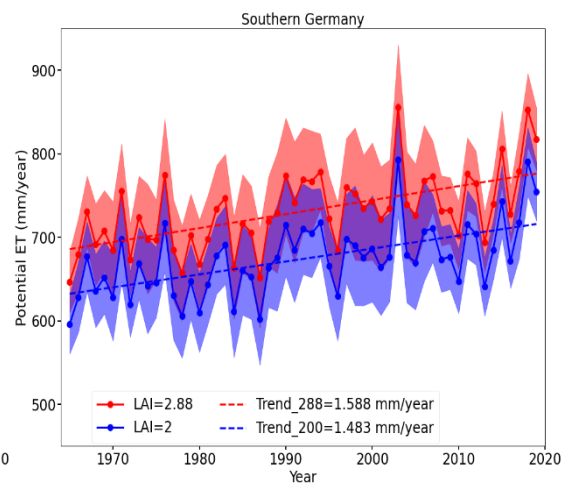

(d)

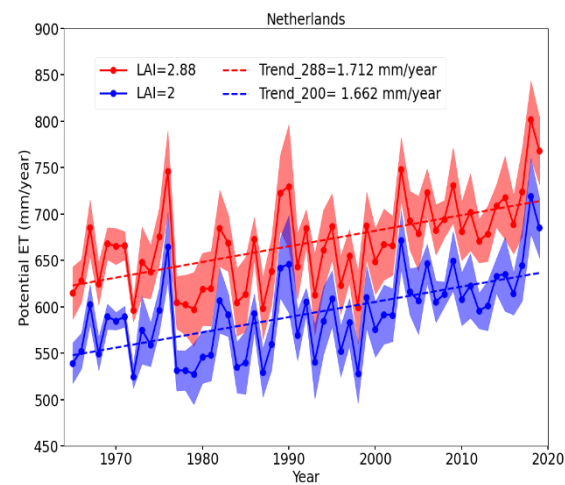

(e)

**Figure S1.** Potential ET for HYDRUS-1D simulations with LAI=2.88 (red) and LAI=2.0 (blue) for (a) North, (b) West, (c) East and (d) South of Germany and (e) the Netherlands. Shaded areas indicate the 95% confidence interval estimated from (the limited) number of sites in each domain.

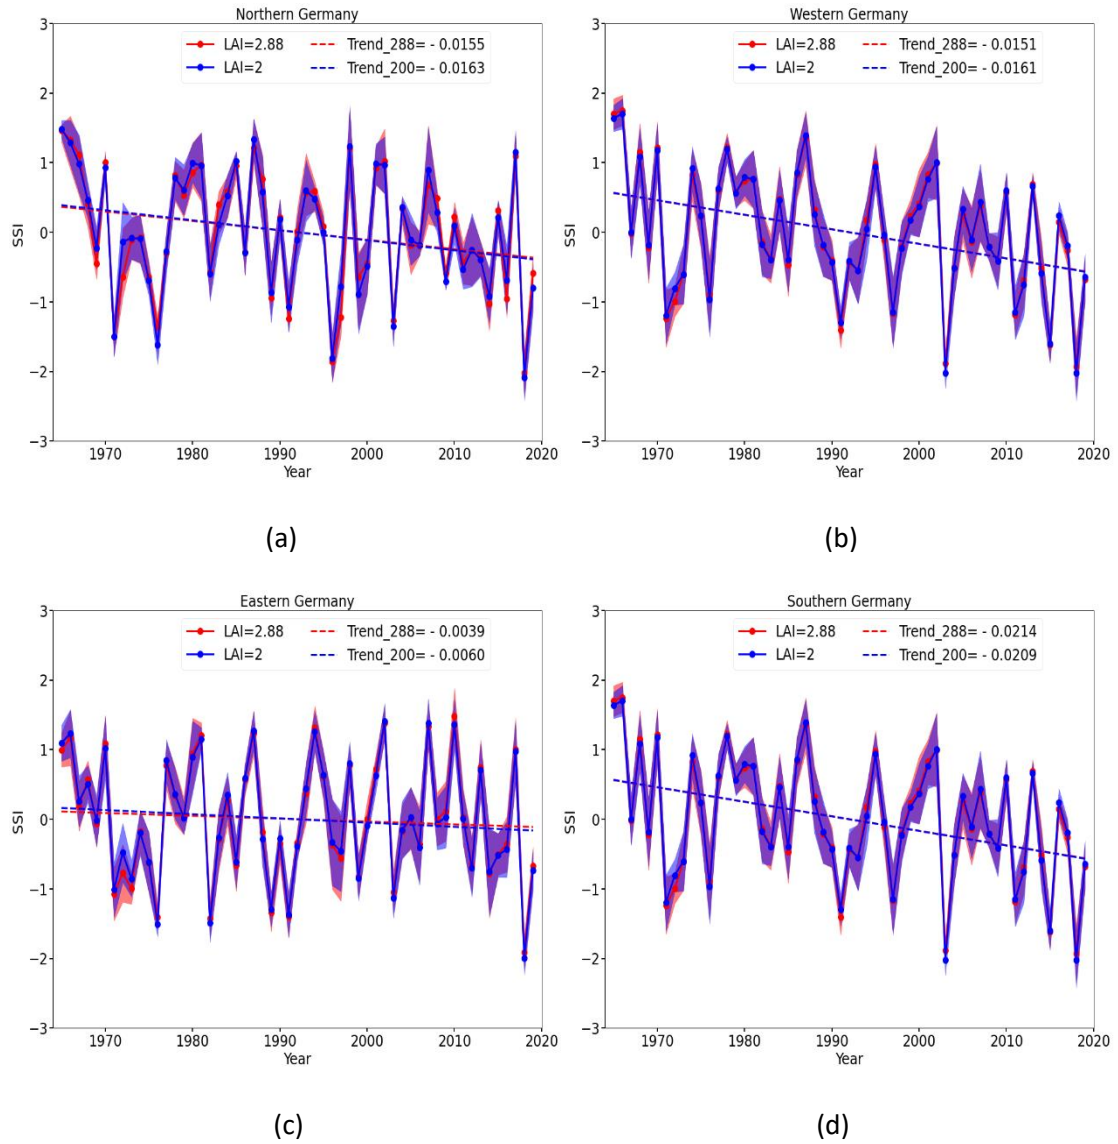

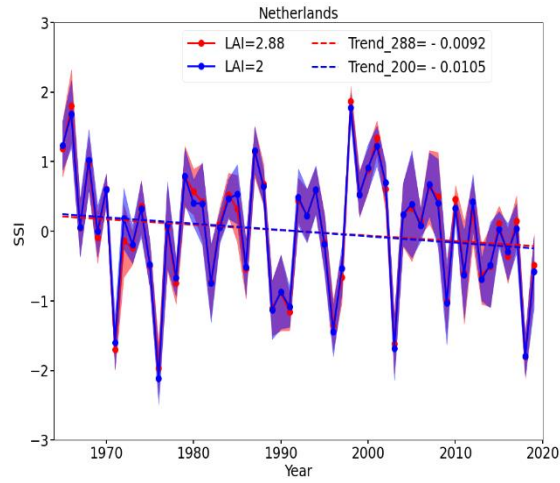

(e)

**Figure S2.** Standardized soil moisture index for HYDRUS-1D simulations for LAI=2.88 (red) and LAI=2.0 (blue) for ((a) North, (b) West, (c) East and (d) South of Germany and (e) the Netherlands. Shaded areas indicate the 95% confidence interval estimated from (the limited) number of sites in each domain.

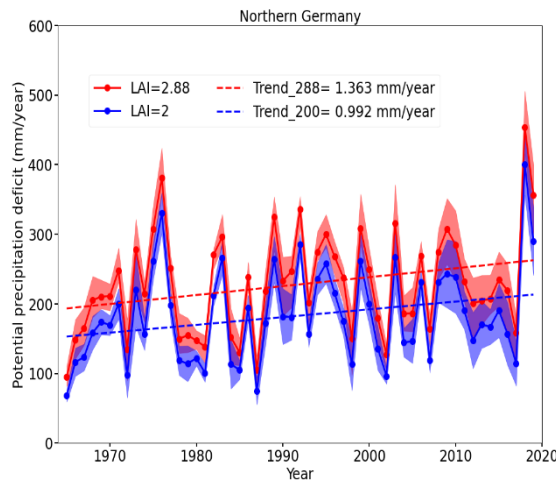

(a)

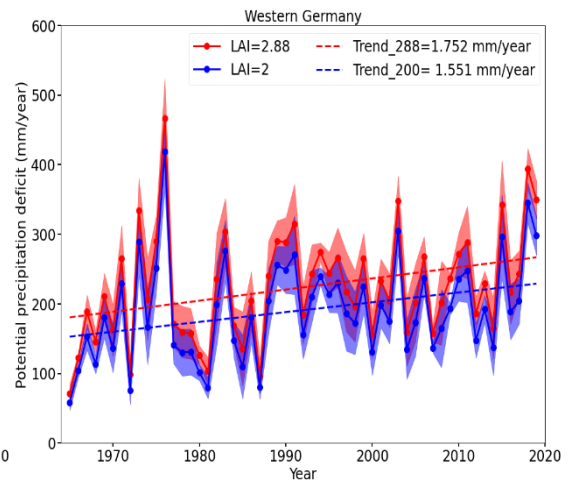

(b)

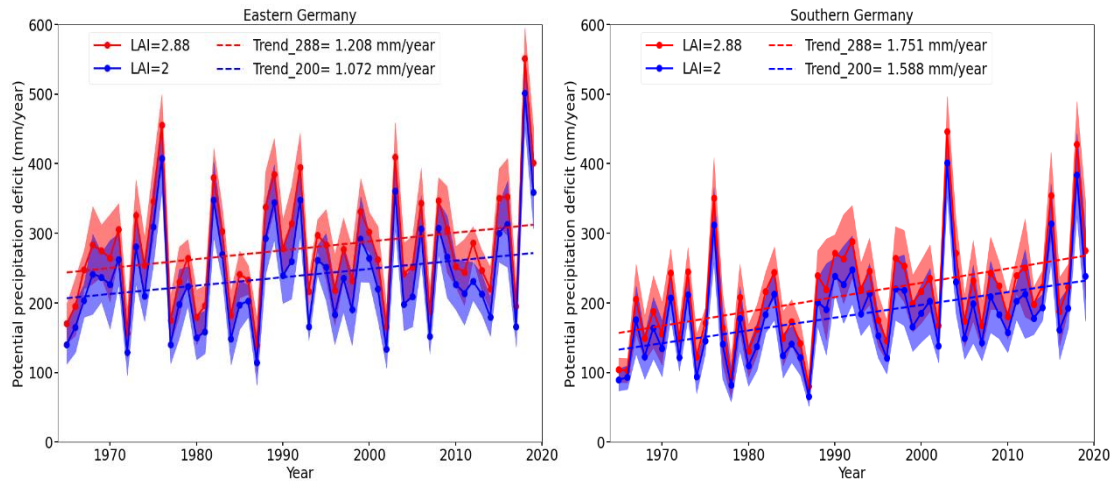

(c)

(d)

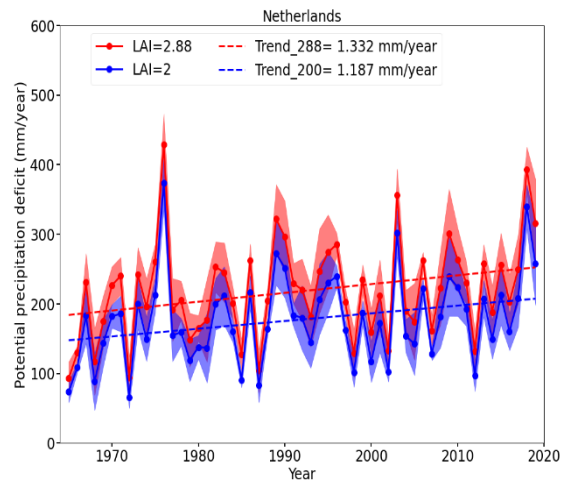

(e)

**Figure S3.** Potential precipitation deficit for HYDRUS-1D simulations for LAI=2.88 (red) and LAI=2.0 (blue) for (a) North, (b) West, (c) East and (d) South of Germany and (e) the Netherlands. Shaded areas indicate the 95% confidence interval estimated from (the limited) number of sites in each domain.

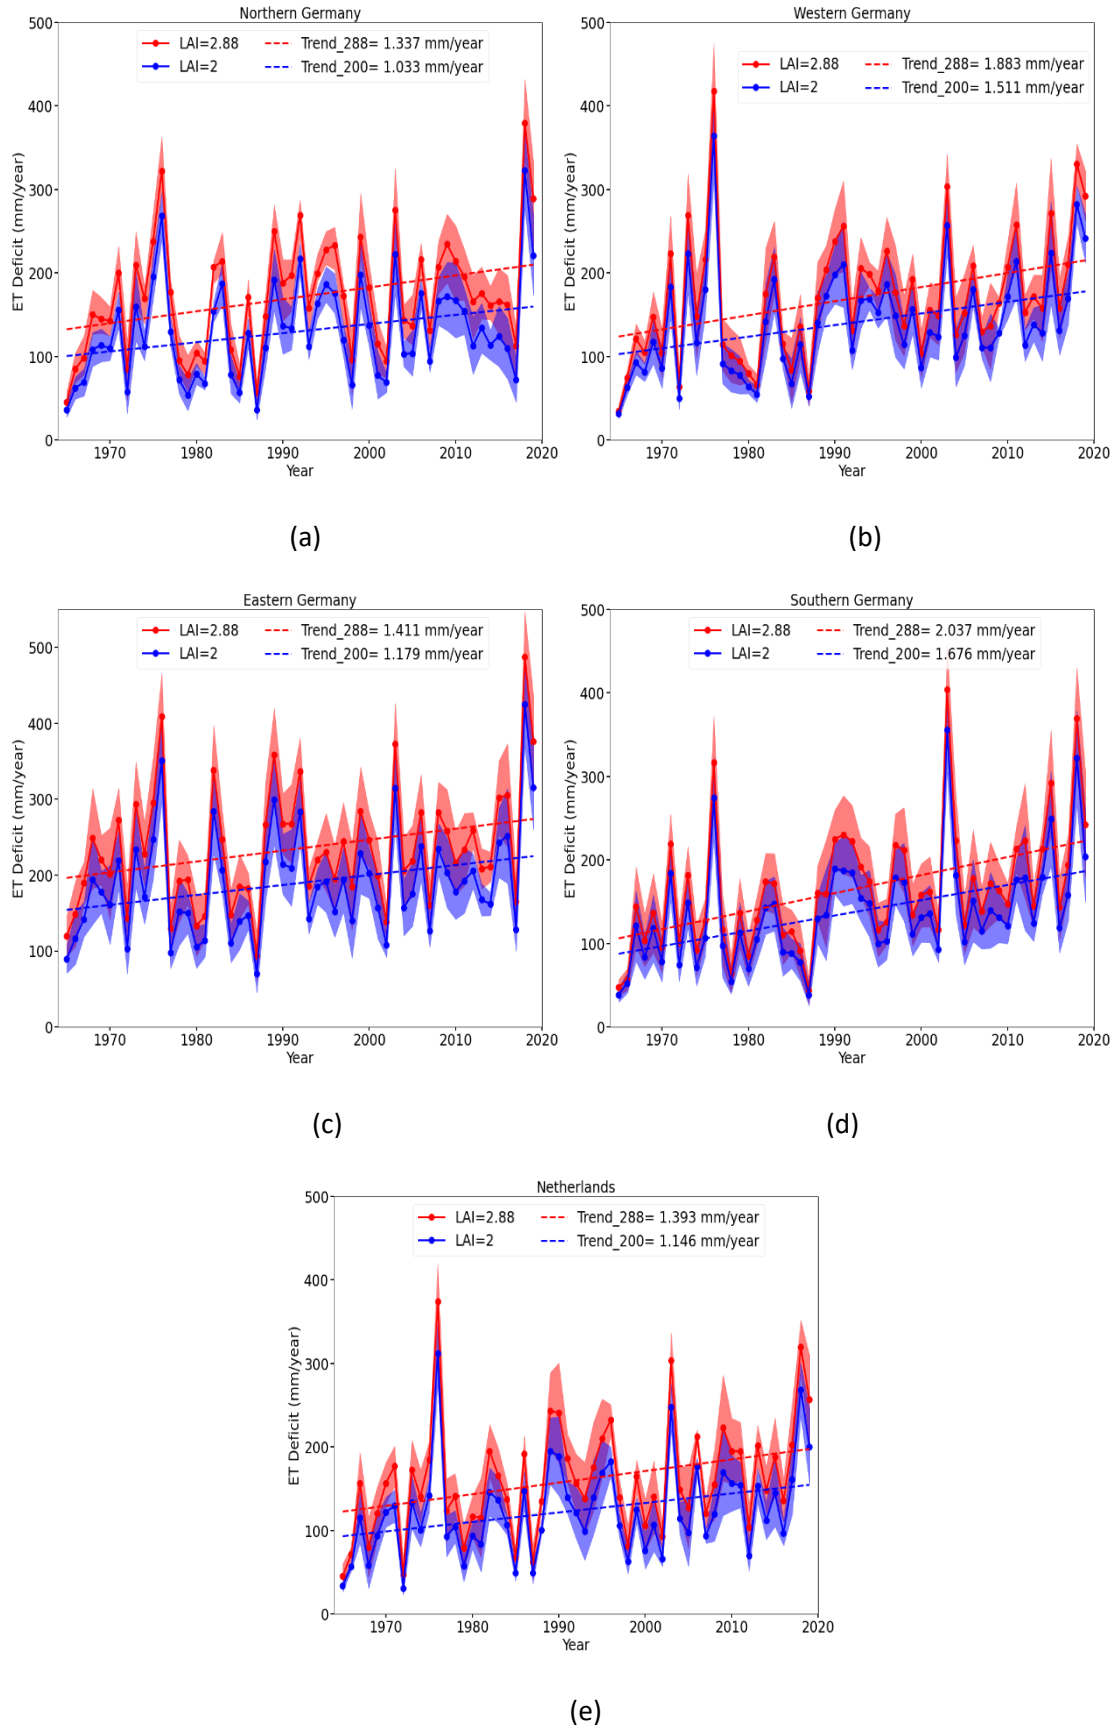

**Figure S4.** ET deficit for HYDRUS-1D simulations for LAI=2.88 (red) and LAI=2.0 (blue) for (a) North, (b) West, (c) East and (d) South of Germany and (e) the Netherlands. Shaded areas

indicate the 95% confidence interval estimated from (the limited) number of sites in each domain.
